# Supplementary material for: Accurate Lipid Quantification of Tissue Homogenates Requires Suitable Sample Concentration, Solvent Composition, and Homogenization Procedure—A Case Study in Murine Liver
Source: Metabolites. 2021 Jun 8;11(6):365. doi: 10.3390/metabo11060365 (PMC8228350; doi:10.3390/metabo11060365)
Supplement: Supplementary file 1 [file metabolites-11-00365-s001.zip › metabolites-1238830-supplementary.pdf]

## Supplemental Material

# Accurate Lipid Quantification of Tissue Homogenates Requires Suitable Sample Concentration, Solvent Composition, and Homogenization Procedure – a Case Study in Murine Liver

Marcus Höring <sup>1</sup>, Sabrina Krautbauer <sup>1</sup>, Louisa Hiltl <sup>1</sup>, Verena Babl <sup>1</sup>, Alexander Sigrüener <sup>1</sup>, Ralph Burkhardt <sup>1</sup> and Gerhard Liebisch <sup>1,\*</sup>

<sup>1</sup> University Hospital of Regensburg, Institute of Clinical Chemistry and Laboratory Medicine, Franz-Josef-Strauß-Allee 11, 93053 Regensburg, Germany; marcus.hoering@ukr.de (M.H.); sabrina.krautbauer@ukr.de (S.K.); louisa.hiltl@stud.uni-regensburg.de (L.H.); verena.babl@klinik.uni-regensburg.de (V.B.); alexander.sigrüener@ukr.de (A.S.); ralph.burkhardt@ukr.de (R.B.)

\* Correspondence: gerhard.liebisch@ukr.de; Tel.: +49941/9446240

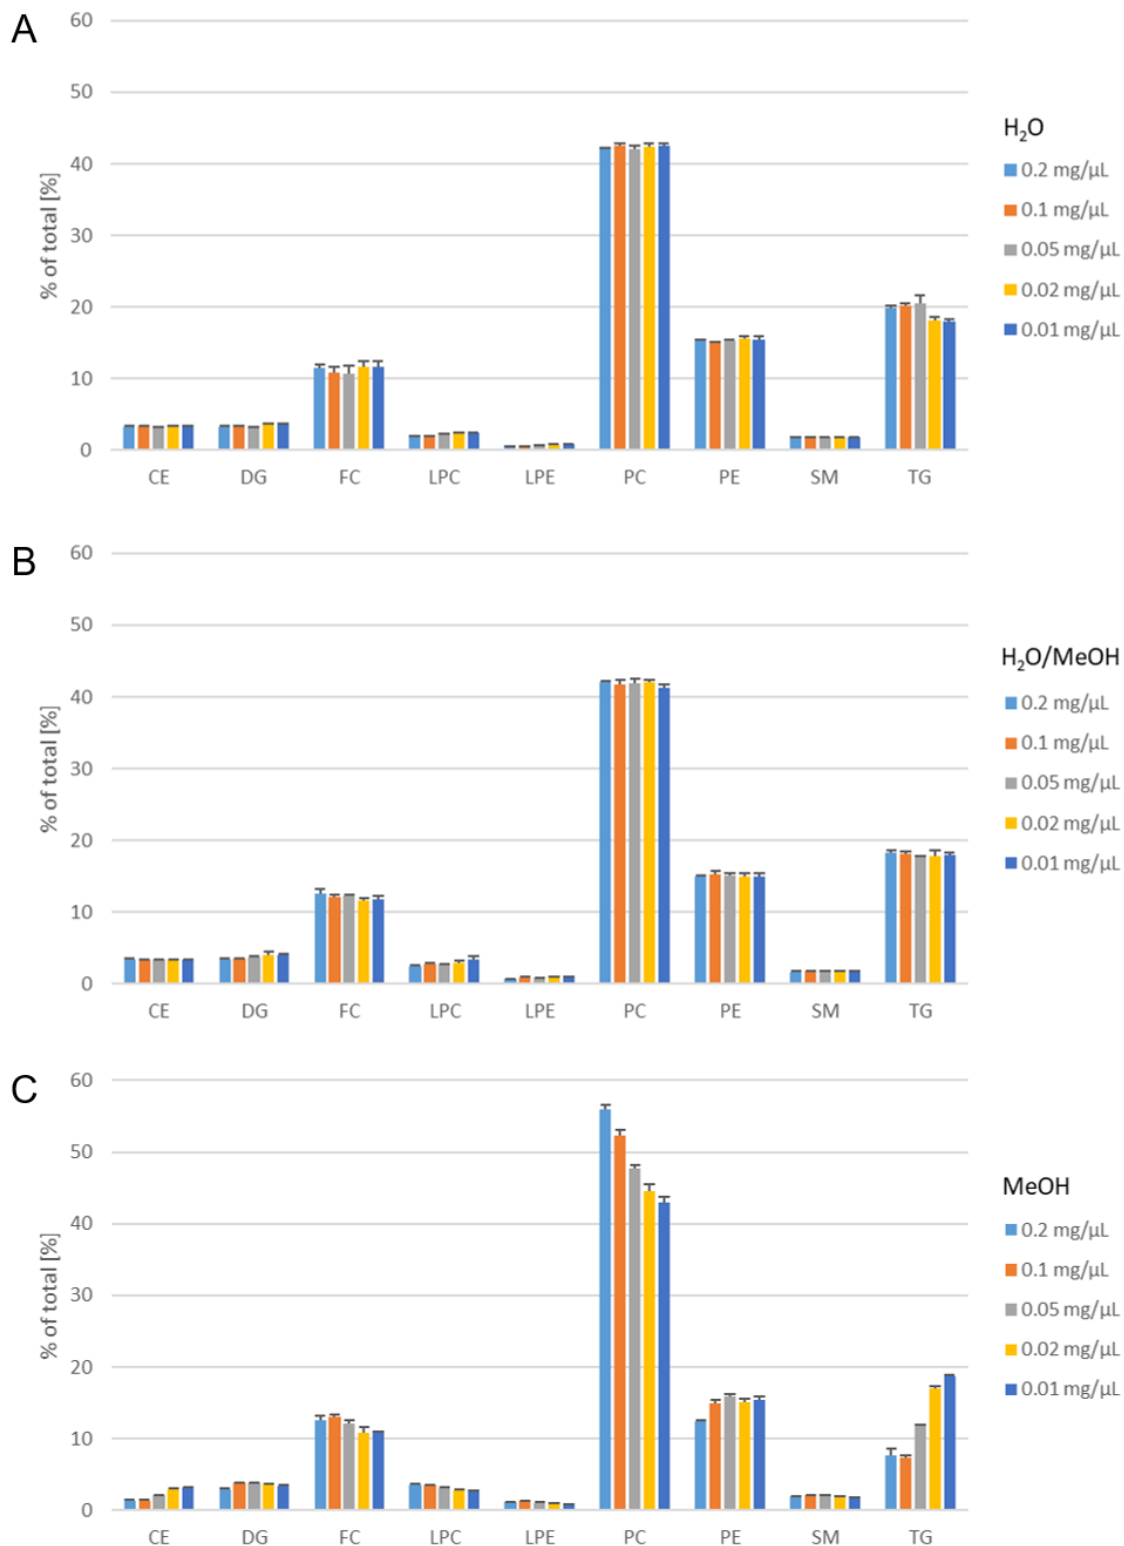

**Figure S1.** Lipid class composition of mouse liver tissue suspended at concentrations of 0.01, 0.02, 0.05, 0.1, or 0.2 mg/μL in (A) H<sub>2</sub>O, (B) H<sub>2</sub>O/MeOH = 1/1 (v/v), or (C) MeOH. The tissue was ground in liquid nitrogen with mortar and pestle. Displayed are mean  $\pm$  SD of a triplicate analysis.

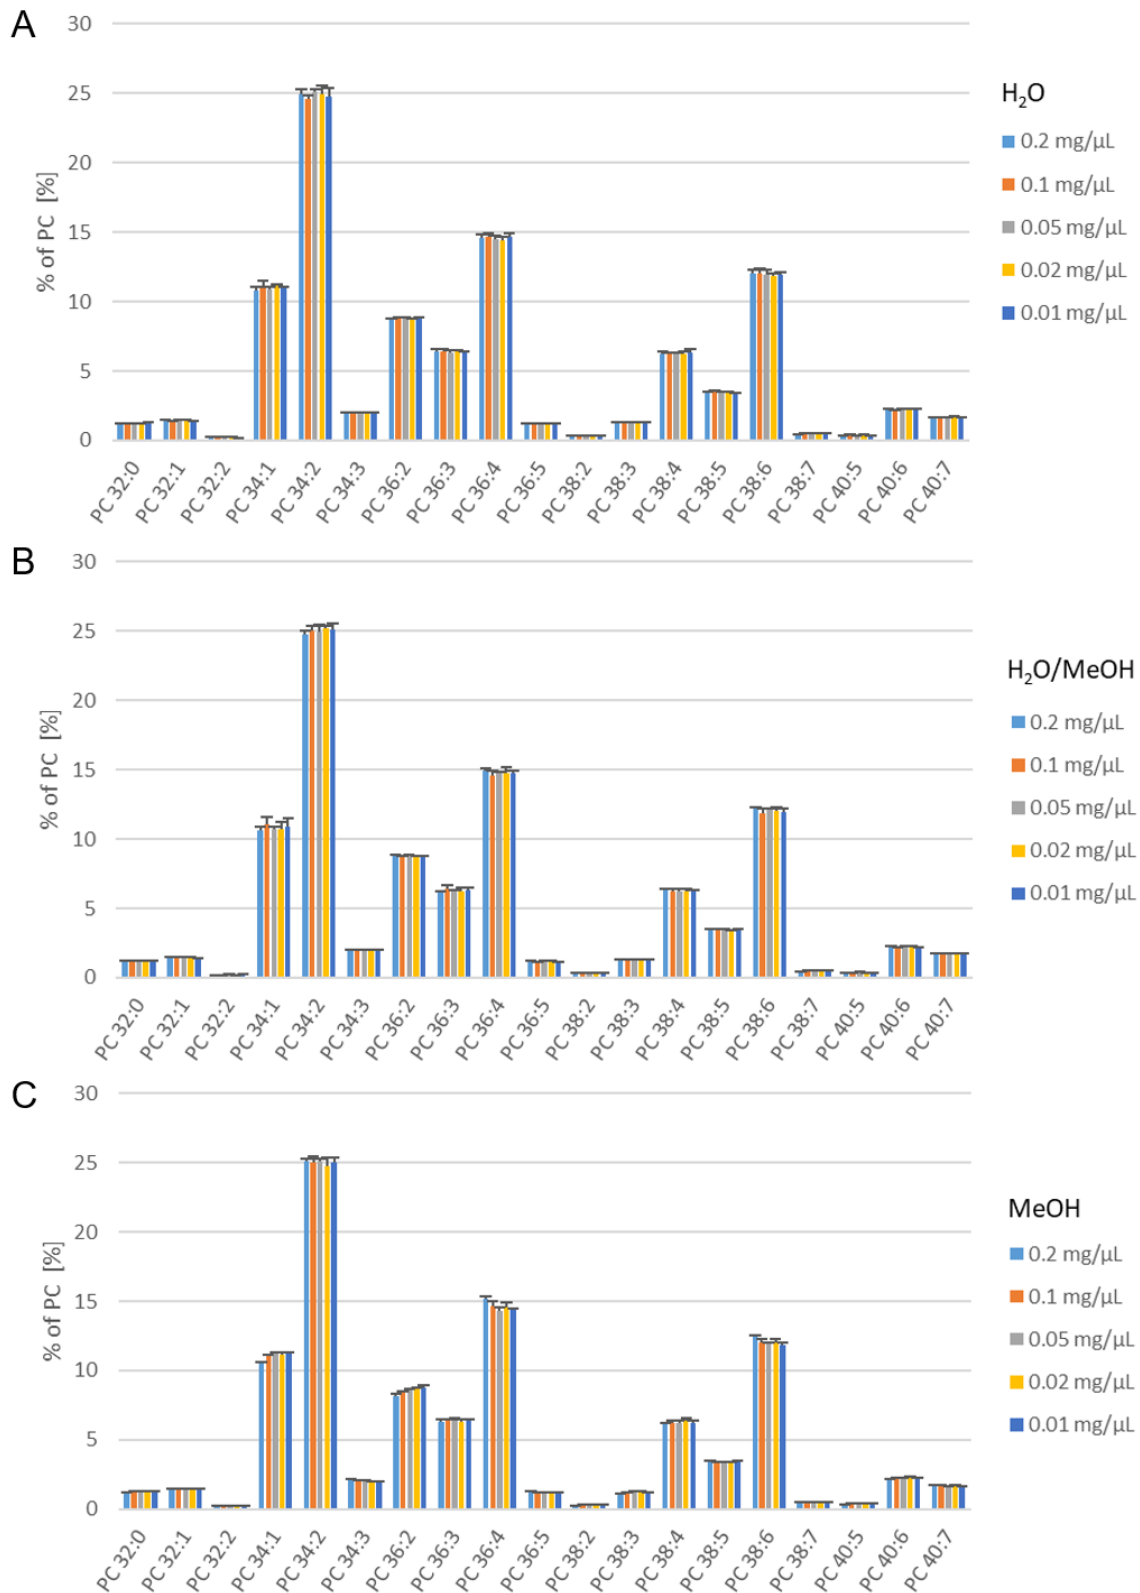

**Figure S2.** Phosphatidylcholine (PC) species profile of mouse liver tissue suspended at concentrations of 0.01, 0.02, 0.05, 0.1, or 0.2 mg/ $\mu\text{L}$  in (A)  $\text{H}_2\text{O}$ , (B)  $\text{H}_2\text{O/MeOH}$  = 1/1 (v/v), or (C)  $\text{MeOH}$ . The tissue was ground in liquid nitrogen with mortar and pestle. Displayed are mean  $\pm$  SD of a triplicate analysis.

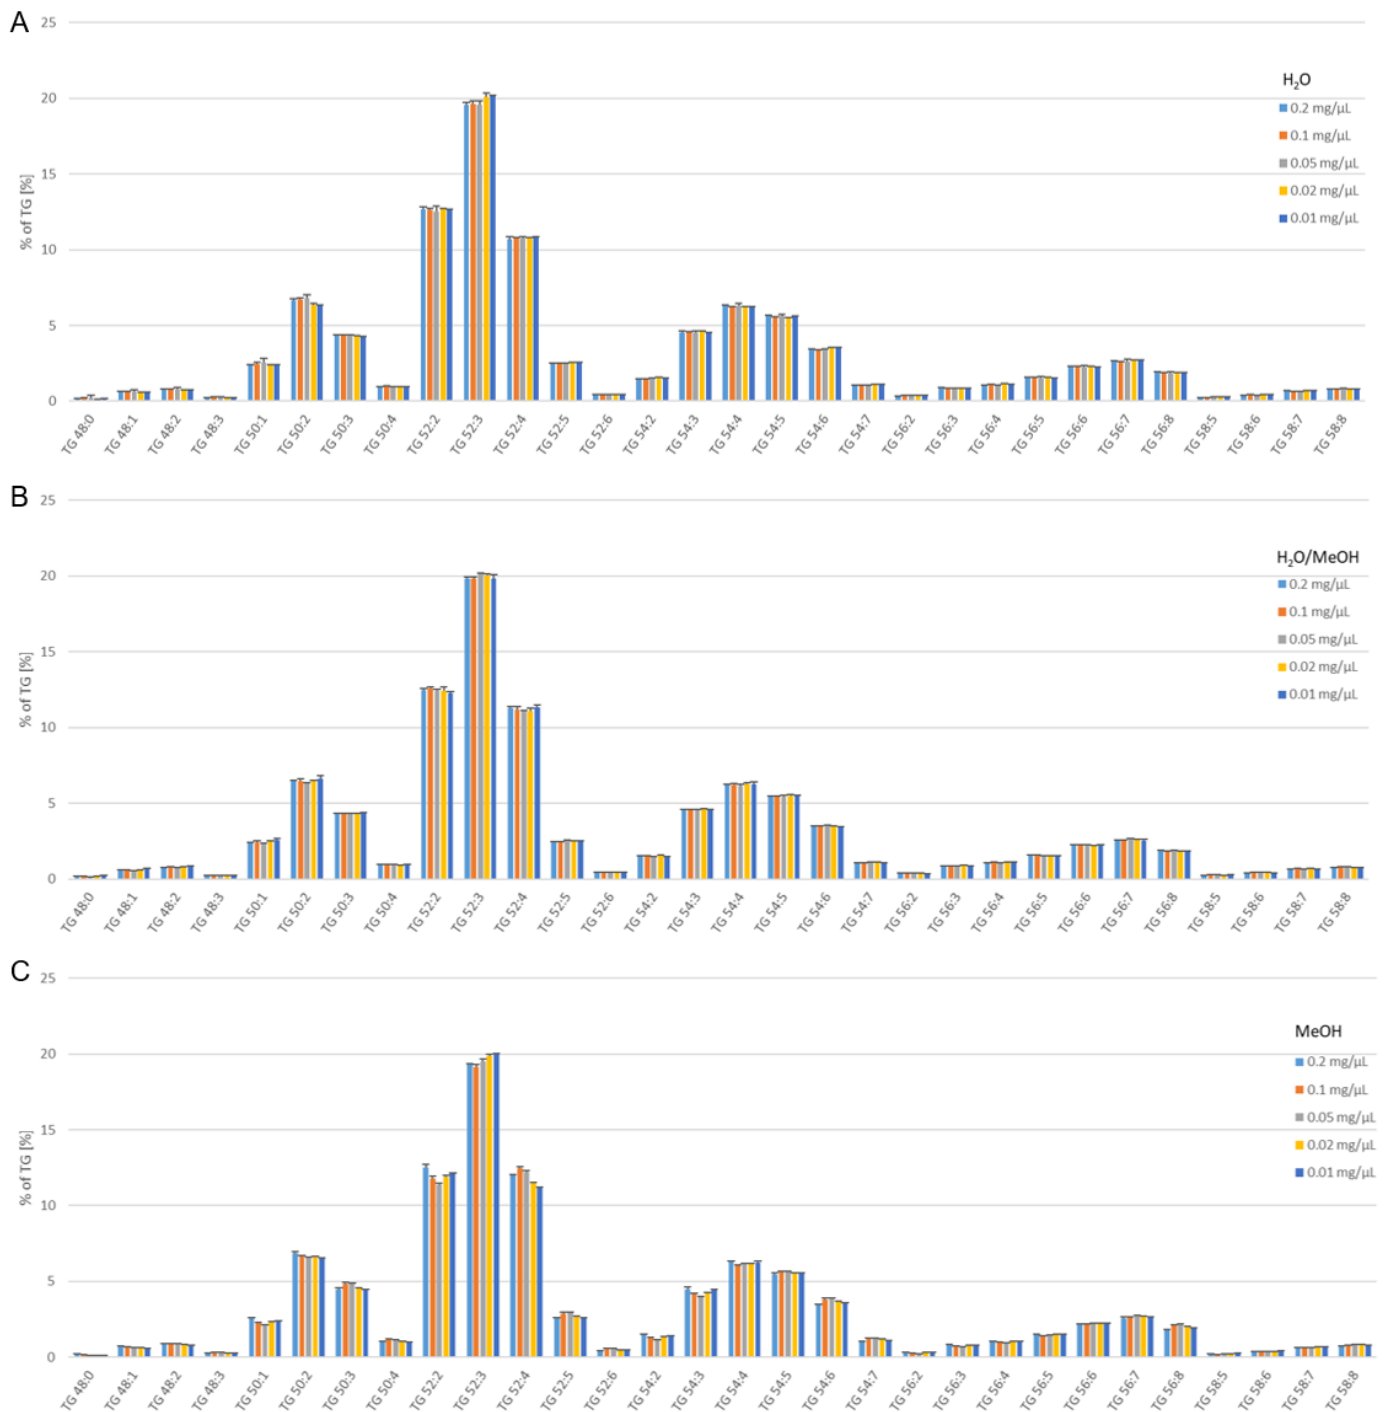

**Figure S3.** Triglyceride (TG) species profile of mouse liver tissue suspended at concentrations of 0.01, 0.02, 0.05, 0.1, or 0.2 mg/ $\mu L$  in (A)  $H_2O$ , (B)  $H_2O/MeOH = 1/1$  (v/v), or (C)  $MeOH$ . The tissue was ground in liquid nitrogen with mortar and pestle. Displayed are mean  $\pm$  SD of a triplicate analysis.
